# Supplementary material for: Optimization and Validation of a New Microbial Inhibition Test for the Detection of Antimicrobial Residues in Living Animals Intended for Human Consumption
Source: MDPI journal article supplement (doi:10.3390/foods10081897), 2021-08-16
Supplement: s1 [file s1]

**Table S1.** e-Reader® values obtained with Explorer®-Blood for the different combinations of antimicrobials and concentrations tested (spiked samples). Each column (R1–R10) presents the result of each of the replicates analyzed, as well as de medium value, standard deviation (SD) and qualitative result (+/–). For comparison purposes and as a reference, the last column includes the EU-MRLs for muscle (Commission Regulation (EU) No 37/2010). Concentration is presented as  $\mu\text{g Kg}^{-1}$ . Concentrations in bold correspond to the LoDs of the method.

| Molecule        | Concentration | n  | R1  | R2  | R3  | R4  | R5  | R6  | R7  | R8  | R9  | R10 | e-Reader® Value | SD | Result | EU-MRL (Muscle) |
|-----------------|---------------|----|-----|-----|-----|-----|-----|-----|-----|-----|-----|-----|-----------------|----|--------|-----------------|
| Amoxicillin     | 10            | 3  | 76  | 82  | 80  |     |     |     |     |     |     |     | 79              | 3  | +      |                 |
|                 | <b>15</b>     | 8  | 117 | 117 | 117 | 109 | 125 | 127 | 129 | 129 |     |     | 121             | 7  | +      | <b>50</b>       |
|                 | 20            | 3  | 127 | 123 | 124 |     |     |     |     |     |     |     | 125             | 2  | +      |                 |
| Cefalexin       | 100           | 5  | 34  | 39  | 38  | 38  | 35  |     |     |     |     |     | 37              | 2  | –      |                 |
|                 | 200           | 10 | 73  | 74  | 71  | 50  | 43  | 49  | 66  | 64  | 107 | 105 | 70              | 22 | +/–    |                 |
|                 | <b>250</b>    | 8  | 67  | 73  | 76  | 65  | 65  | 65  | 60  | 65  |     |     | 67              | 5  | +      | <b>200</b>      |
|                 | 300           | 5  | 75  | 76  | 73  | 116 | 112 |     |     |     |     |     | 90              | 22 | +      |                 |
| Ceftiofur       | 100           | 3  | 31  | 32  | 32  |     |     |     |     |     |     |     | 32              | 1  | –      |                 |
|                 | 200           | 4  | 33  | 33  | 35  | 62  |     |     |     |     |     |     | 41              | 14 | –      |                 |
|                 | <b>300</b>    | 8  | 107 | 118 | 102 | 110 | 104 | 99  | 92  | 90  |     |     | 103             | 9  | +      | <b>1000</b>     |
|                 | 400           | 3  | 121 | 117 | 120 |     |     |     |     |     |     |     | 119             | 2  | +      |                 |
| Sulfamethazine  | <b>100</b>    | 8  | 65  | 65  | 79  | 81  | 81  | 83  | 75  | 76  |     |     | 76              | 7  | +      | <b>100</b>      |
|                 | 150           | 7  | 82  | 80  | 91  | 92  | 80  | 79  | 94  |     |     |     | 85              | 7  | +      |                 |
|                 | 200           | 8  | 83  | 78  | 90  | 90  | 87  | 88  | 86  | 93  |     |     | 87              | 5  | +      |                 |
| Sulfadiazine    | 50            | 3  | 55  | 50  | 54  |     |     |     |     |     |     |     | 53              | 3  | –      |                 |
|                 | <b>100</b>    | 8  | 94  | 89  | 89  | 88  | 87  | 82  | 90  | 94  |     |     | 89              | 4  | +      | <b>100</b>      |
|                 | 150           | 3  | 95  | 99  | 97  |     |     |     |     |     |     |     | 97              | 2  | +      |                 |
| Oxytetracycline | 100           | 8  | 60  | 57  | 51  | 54  | 57  | 56  | 52  | 51  |     |     | 55              | 3  | +/–    |                 |
|                 | <b>200</b>    | 8  | 84  | 77  | 82  | 80  | 91  | 74  | 78  | 74  |     |     | 80              | 6  | +      | <b>100</b>      |
|                 | 300           | 3  | 98  | 96  | 98  |     |     |     |     |     |     |     | 97              | 1  | +      |                 |
|                 | <b>100</b>    | 8  | 77  | 78  | 70  | 77  | 84  | 78  | 87  | 91  |     |     | 80              | 7  | +      | <b>100</b>      |
|                 | 200           | 8  | 60  | 65  | 102 | 95  | 98  | 102 | 102 | 96  |     |     | 90              | 17 | +      |                 |

|             |      |    |     |     |     |     |     |     |     |     |    |    |     |   |   |      |
|-------------|------|----|-----|-----|-----|-----|-----|-----|-----|-----|----|----|-----|---|---|------|
| Doxycycline | 300  | 8  | 91  | 97  | 114 | 111 | 113 | 111 | 114 | 114 |    |    | 108 | 9 | + |      |
|             | 400  | 3  | 112 | 108 | 110 |     |     |     |     |     |    |    | 110 | 2 | + |      |
| Neomycin    | 15   | 3  | 70  | 79  | 76  |     |     |     |     |     |    |    | 75  | 5 | + |      |
|             | 25   | 10 | 103 | 106 | 97  | 87  | 101 | 99  | 96  | 105 | 95 | 96 | 99  | 6 | + | 500  |
|             | 50   | 3  | 110 | 115 | 114 |     |     |     |     |     |    |    | 113 | 3 | + |      |
| Apramycin   | 500  | 8  | 122 | 120 | 117 | 127 | 127 | 122 | 125 | 122 |    |    | 123 | 3 | + | 1000 |
|             | 1000 | 3  | 126 | 130 | 129 |     |     |     |     |     |    |    | 128 | 2 | + |      |
|             | 1500 | 3  | 128 | 125 | 128 |     |     |     |     |     |    |    | 127 | 2 | + |      |
| Tylosin     | 25   | 3  | 59  | 58  | 60  |     |     |     |     |     |    |    | 59  | 1 | + |      |
|             | 50   | 8  | 94  | 92  | 95  | 91  | 95  | 93  | 91  | 87  |    |    | 92  | 3 | + | 100  |
|             | 75   | 3  | 110 | 97  | 104 |     |     |     |     |     |    |    | 104 | 7 | + |      |
| Lincomycin  | 200  | 8  | 65  | 66  | 67  | 62  | 66  | 69  | 58  | 65  |    |    | 65  | 3 | + | 100  |
|             | 300  | 8  | 78  | 77  | 71  | 66  | 82  | 71  | 72  | 70  |    |    | 73  | 5 | + |      |
|             | 400  | 3  | 78  | 79  | 78  |     |     |     |     |     |    |    | 78  | 1 | + |      |
